1 **Desert Dingo (*Canis lupus dingo*) genome provides insights into their role in the**  
2 **Australian ecosystem.**

3

4 Sonu Yadav, Olga Dudchenko, Meera Esvaran, Benjamin D. Rosen, Matt A. Field, Ksenia  
5 Skvortsova, Richard J. Edwards, Shyam Gopalakrishnan, Jens Keilwagen, Blake J. Cochran,  
6 Bikash Manandhar, Martin Bucknall, Sonia Bustamante, Jacob Agerbo Rasmussen, Richard  
7 G. Melvin, Arina Omer, Zane Colaric, Eva K. F. Chan, Andre E. Minoche, Timothy P.L.  
8 Smith, M. Thomas P. Gilbert, Ozren Bogdanovic, Robert A. Zammit, Torsten Thomas, Erez  
9 L. Aiden, J. William O. Ballard

10 **Abstract**

11 The dingo is Australia's iconic top-order predator and arrived on the continent between  
12 5,000-8,000 years ago. To provide an unbiased insight into its evolutionary affiliations and  
13 biological interactions, we coupled long-read DNA sequencing with a multiplatform  
14 scaffolding approach to produce an *ab initio* genome assembly of the desert dingo (85X  
15 coverage) we call CanLup\_DDS. We compared this genome to the Boxer (CanFam3.1) and  
16 German Shepherd dog (CanFam\_GSD) assemblies and characterized lineage-specific and  
17 shared genetic variation ranging from single- to megabase pair-sized variants. We identified  
18 21,483 dingo-specific and 16,595 domestic dog-specific homozygous structural variants  
19 mediating genic and putative regulatory changes. Comparisons between the dingo and  
20 domestic dog builds detected unique inversions on Chromosome 16, structural variations in  
21 genes linked with starch metabolism, and seven differentially methylated genes. To  
22 experimentally assess genomic differences 17 dingoes and 15 German Shepherd dogs were  
23 fed parallel diets for 14 days. In dingoes, low *AMY2B* copy number and serum amylase levels  
24 are linked with high cholesterol and LDL levels. Gut microbiome analyses revealed  
25 enrichment of the family *Clostridiaceae*, which can utilize complex resistant starch, while  
26 scat metabolome studies identified high phenylethyl alcohol concentrations that we posit are  
27 linked with territory marking. Our study provides compelling genomic, microbiome, and  
28 metabolomic links showing the dingo has distinct physiology from domestic breed dogs with  
29 a unique role in the ecosystem.

30

31

32 **Main**

33

34 Australia has the worst mammalian extinction rate of any country in the world and the  
35 catastrophic bushfires of 2019-20 have fast tracked multiple species towards extinction.

36 Concomitant with public education a strategic priority must be to restore ecosystem balance.

37 One approach to restoring ecosystems and to conferring resilience against globally

38 threatening processes is to develop our understanding of the functionality of predators<sup>1</sup>.

39 Dingoes have been the Australia's apex predator since their arrival 5,000-8,000 years ago<sup>2,3</sup>.

40 They show a unique suite of behavioural traits including scent-marking for social

41 communication, territory defence and to synchronise reproduction. Historically, they fed on a

42 marsupials and reptiles. In native ecosystems, they tend to consume the most prevalent

43 species<sup>4</sup>. In disturbed environments dingoes eat prey of increasing body size as aridity

44 increases<sup>5</sup>. This opportunistic hunting has brought the dingo into conflict with pastoralists

45 and feral dogs.

46

47 To resolve the debate around the ecological role of dingoes in the Australian

48 ecosystem it is crucial to identify the structural and functional genetic differences that

49 distinguish them from feralised domestic dogs. To date, genomic studies have been based on

50 mapping re-sequenced genomes to the domestic dog reference genome<sup>6-9</sup>. The alignment of

51 re-sequenced data to a single reference genome underestimates species-specific variation, yet

52 computational analyses have established the dingo genome harbours multiple positively

53 selected genes related to metabolism<sup>6,10,11</sup>. Further, dingoes have retained the ancestral

54 pancreatic amylase *AMY2B* copy number (n=2) with one or more copy number expansions in

55 domestic dogs<sup>10</sup>. We explore the genomic divergence between a desert dingo and two

56 domestic dog breeds and experimentally consider whether differences in the biochemistry,

57 physiology and digestive gut microbiome influence organismal functions and ecological  
58 roles.

59

60 We assemble the genome of a wild-found dingo named “Sandy” (Fig. 1a) and  
61 compare it with the Boxer (CanFam3.1)<sup>12</sup> and German Shepherd Dog (GSD)  
62 (CanFam\_GSD)<sup>13</sup>. The boxer is a highly derived, brachycephalic breed with a mesocephalic  
63 head shape<sup>13</sup>. GSDs are intermediate in the currently accepted modern domestic dog  
64 phylogeny<sup>14</sup>, are morphologically similar to dingo with medium body size and are common  
65 on farms. GSD crossbreds are also common feral dogs. We conducted structural variation  
66 analyses, genomic selection scans, and DNA methylation studies to identify dingo genomic  
67 features. To examine the influence of the distinct evolutionary histories on organismal  
68 physiology, we experimentally compared dingo and GSD serum, gut microbiome, and scat  
69 metabolites. Our study uncovers compelling evidence to suggest the Australian dingo has a  
70 unique role in the ecosystem that is mediated by its evolutionary history and ancient  
71 divergence from domestic dog breeds.

72

### 73 **Genome assembly, annotation, and comparative analyses**

74 Genomic DNA was extracted from a pure female dingo found in the Strzelecki Desert in  
75 South Australia. The genome was assembled using a combination of long-read sequencing  
76 approaches with Hi-C scaffolding (Fig. 1b; Extended Data Fig. 1). The assembly has a size of  
77 2.35 Gb, consists of 159 scaffolds with a contig and scaffold N50 length of 64.3 Mb (contig  
78 L50=20, scaffold L50=14) and 33.7 kb of gap sequence (Supplementary Information 1). The  
79 full-length chromosome scaffolds in the assembly accounted for 99.46 % of the genome. In  
80 total 93.0 % of the conserved single-copy genes were complete. Compiling BUSCO results  
81 across all assembly stages reveals at least 6,036 conserved genes (96.5 %) are present and

82 complete in the assembly, with only 142 genes (2.27 %) not found (Fig 1c, Supplementary  
83 Table 1.1, 1.2). BUSCO analysis of the longest isoform per annotated gene increased this  
84 number to 6,174 (98.7%) complete with only 18 (0.3%) missing (Supplementary Table 1.1).  
85 KAT kmer analysis showed no sign of missing data nor large duplications (Extended Data  
86 Fig. 2).

87

88         Considering the major chromosome alignments, the dingo assembly covers 99.16% of  
89 the CanFam3.1 assembly compared to 99.31% of the CanFam\_GSD assembly. Conversely,  
90 99.03% of the dingo aligns with CanFam3.1, while 98.54% of the CanFam\_GSD assembly  
91 aligns to CanFam3.1. These differences are largely attributable to ~38 Mb of extra sequence  
92 in CanFam\_GSD relative to CanFam3.1 compared to only ~1Mb of extra sequence in the  
93 dingo assembly. Synteny plots were generated for each chromosome and overall there were  
94 limited large-scale genomic rearrangements. Chromosome 16 however contained two large  
95 inversions in the dingo compared to CanFam3.1 (Fig. 1d) and one large inversion  
96 CanFam\_GSD vs CanFam3.1 (Extended Data Fig. 3) indicating differential evolutionary  
97 signatures in dingoes compared to other canid lineages.

98

99         Several approaches were employed to assess the level of variation in the dingo  
100 genome (Supplementary Information 1.9). Small-scale variations (SV), generally <50 bp,  
101 were detected in both the dingo assembly and CanFam\_GSD relative to CanFam3.1. Overall,  
102 a total of 4.5 k SNPs were called in dingo compared to 3.6 k SNPs in CanFam\_GSD,  
103 representing 22% more SNP calls in dingo. Additionally, there were 6.2 k small indels  
104 detected in the dingo compared to 5.1 k small indels in CanFam\_GSD representing 21%  
105 more small indel calls.

106

107           Relative to CanFam3.1, a total of 75.8 k SVs were detected using Nanopore reads and  
108   116.2 k SVs were detected using PacBio reads. Fewer SVs were detected overall relative to  
109   CanFam\_GSD with a total of 63.8 k SVs detected using Nanopore reads and 99.1 k SVs  
110   detected using PacBio reads. To account for higher SV false-positive rates, a more  
111   conservative list of SVs was generated consisting of the intersection of PacBio and Nanopore  
112   calls using a consensus approach<sup>15</sup>. This resulted in 73.5 k CanFam SVs and 62.4 k  
113   CanFam\_GSD SVs, of which over 99% are either insertions or deletions. To prioritise  
114   structural variants for further investigation, SVs were overlapped to existing CanFam3.1 gene  
115   annotations and dingo gene annotations generated with GeMoMa (version 1.6.2beta)<sup>16</sup>. With  
116   the CanFam SVs, 29,688 were found to overlap protein-coding genes compared to 26,760 for  
117   CanFam\_GSD SVs. These SVs were then filtered for homozygous events yielding 24,515  
118   CanFam3.1 SVs (representing 8571 unique genes) compared to 21,961 CanFam\_GSD SVs  
119   (representing 7,650 unique genes). The remaining deletions (insertions) represent 13.94  
120   (2.97) Mb of total deleted sequence relative to CanFam3.1 and 5.03 (1.79) Mb relative to  
121   CanFam\_GSD.

122

123           The prioritised SV's were next examined for overlap to specific genes of interest. We  
124   examined all structural variant calls overlapping *AMY2B* as variation in copy number has  
125   been linked to starch diet adaptations<sup>17</sup>. A single SV was detected, a heterozygous 203 bp  
126   deletion detected in the PacBio dingo reads relative to CanFam\_GSD, which contains 7-8  
127   copies of *AMY2B*<sup>13</sup>. This *AMY2B* SV indicates the possibility of diversification of the gene  
128   involved in starch digestion between dingoes and other canids. A broader analysis was  
129   performed overlapping the regions previously identified as important in dog domestication<sup>18</sup>.  
130   In total 132 SVs were identified that overlapped these regions containing 44 unique genes

131 (Supplementary Table 1.3), including *MGAM*, which is also involved in starch metabolic and  
132 catabolic processes.

133

134 To quantify the genetic differentiation and signatures of selection across the genome  
135 between dingoes and two domestic dog breeds, we computed the pairwise  $F_{st}$  between the  
136 dingo, Boxer, and GSD (Supplementary Information 1.10). We did not include additional  
137 breeds because alignments of short read sequences to distinct *de novo* assemblies can cause  
138 bias<sup>19</sup>.  $F_{st}$  distribution of dingo-GSD and dingo-Boxer differed from GSD-Boxer (Fig. 1e).  
139 As expected, selection scan indicated higher genetic differentiation in the dingo-GSD, dingo-  
140 Boxer than GSD-Boxer for *AMY2B* and *MGAM* (Extended Data Fig. 4).

141

142 Next, we compared the DNA methylation of Sandy the dingo and Nala the GSD<sup>13</sup>.  
143 DNA methylation status of the transcription start sites (TSS) associated regulatory regions  
144 may serve as a proxy for the activity of the corresponding gene. The highly methylated gene  
145 promoters are often indicative of a transcriptionally repressed state while unmethylated gene  
146 promoters indicate a transcriptionally permissive state. In our study, five unmethylated  
147 regions with genes: *GAL3ST1*, *NAP1L5*, *FAM83F*, *MAB21L1*, and *UPK3A* showed reduced  
148 DNA methylation in the dingo translating to their higher expression levels (Fig. 1f, 1g) and  
149 two UMRs *LIME1* and *GGT5* showed hypermethylation in dingo (Extended Data Fig. 5). Of  
150 these, *GAL3ST1* is associated with galactose metabolism by catalysing sulfation of  
151 galactose<sup>20</sup>. Dingo and dingo-dog hybrids differ in their galactose metabolism likely linked  
152 with differences in *AMY2B* copy number<sup>21</sup>.

153

154 Assembly, annotation and comparative analyses of the desert dingo genome shows  
155 that it has forked from that of the Boxer and GSD. Likely this is due to the ancient divergence

156 of the dingo from the domestic breeds, recovery of genetic variation since dingoes colonised  
157 Australia 5,000-8,000 years ago and selection for feeding on marsupials with low fat and  
158 high protein meats. In the next section, we conduct a dietary manipulation study to link the  
159 dingo and GSD genomes with organismal biology to gain insight into the roles of dingoes  
160 and feral dogs in the ecosystem (Supplementary Table 2.1).



**Fig. 1: Sandy the Desert dingo and her genome.**

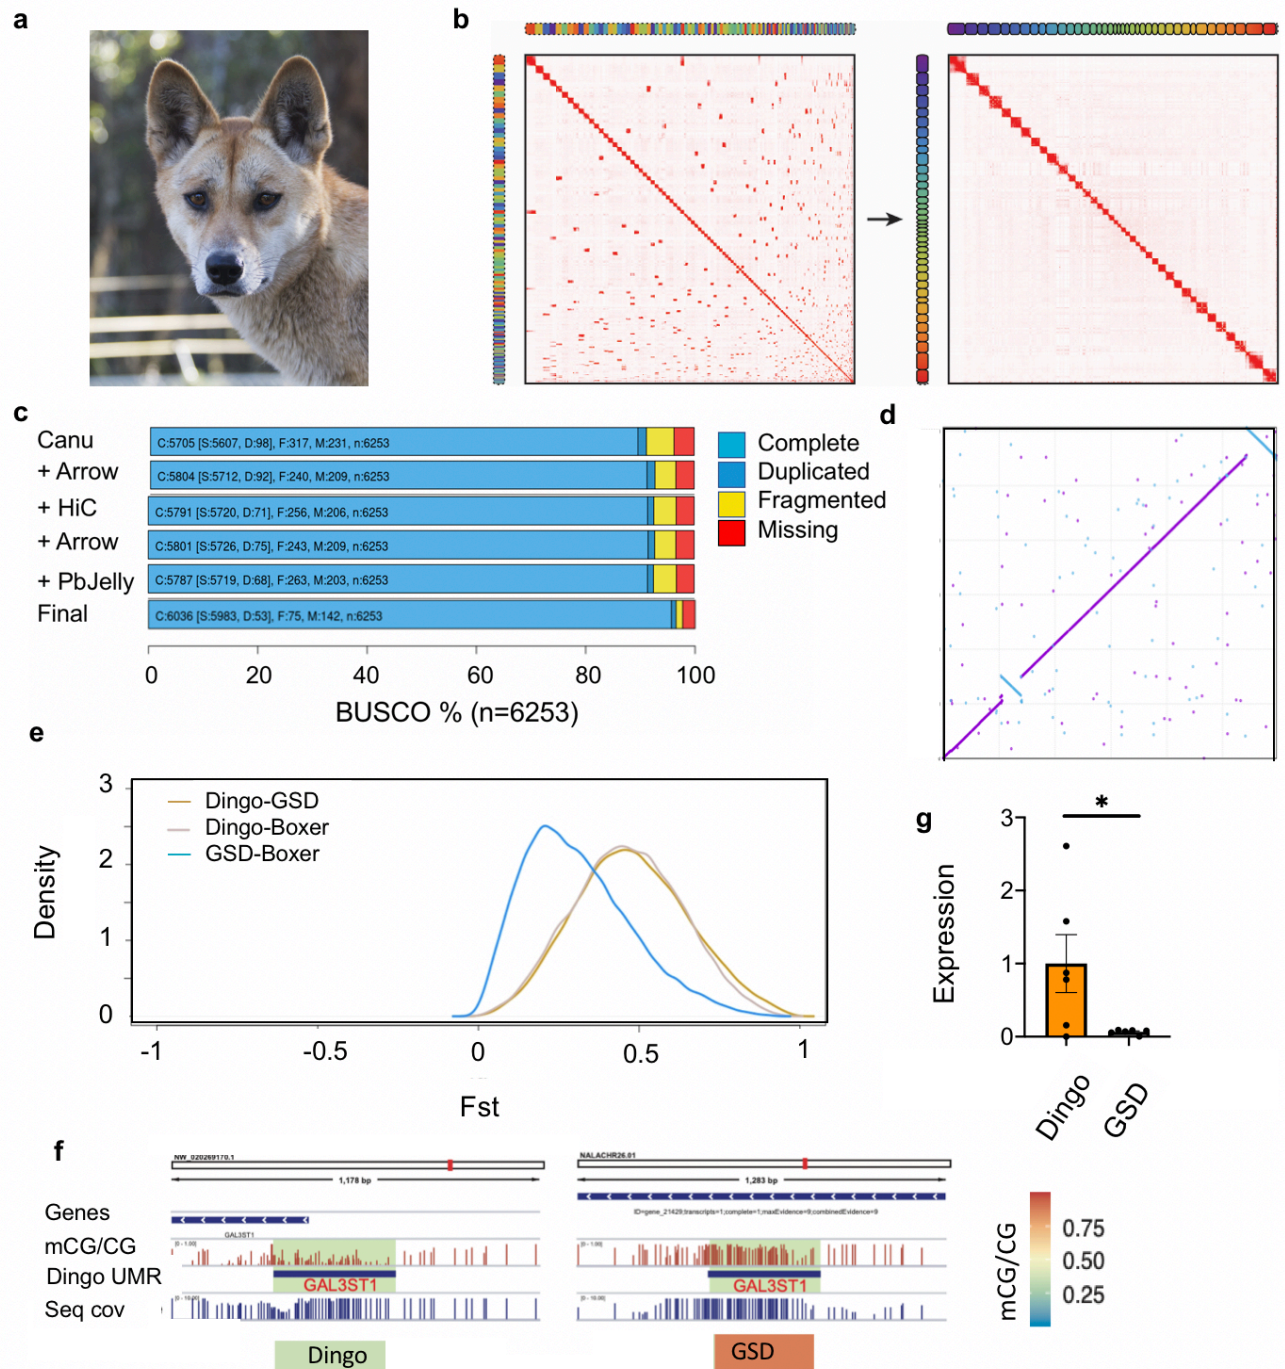

**a**, Sandy as a 3-year-old. She was found as a 4-week old puppy in a remote region of South Australia in 2014. Subsequent genetic testing showed she was a pure desert dingo. **b**, Contact matrices generated by aligning the Hi-C data set to the genome assembly before Hi-C scaffolding (left), and after Hi-C scaffolding (right). Interactive contact matrices are available on [www.dnazoo.org/assemblies](http://www.dnazoo.org/assemblies). **c**, BUSCO v3 completeness scores for different stages of the genome assembly (C: complete, S: single, D: duplicated, F: fragmented, M: missing). **d**, Synteny plot for chromosome 16 CanFamv3.1 (x-axis) vs dingo (y-axis). The dingo assembly contains two large inversions relative to CanFamv3.1. **e**, Fst distribution for Dingo-GSD, Dingo-Boxer and GSD-Boxer (dingo  $n = 10$ , GSD  $n = 20$  and Boxer  $n = 14$ ). **f**, DNA methylation differences at transcription start sites (TSS) proximal regulatory regions (UMRs) in *GAL3ST1* between the dingo and GSD. Heatmap showing DNA methylation levels at TSS-associated UMRs, differentially methylated between dingo and GSD. IGV browser tracks depicting DNA methylation differences at UMRs between the dingo and GSD. **g**, Significant difference in expression of *GAL3ST1* between dingo and GSD ( $t_{(10)}=2.361$ ,  $P = 0.03$ , dingo  $n = 6$ , GSD  $n = 6$ ). Mean SE is shown on the plot. \* shows  $P < 0.05$ .

## 162 **Biochemical, physiological, and microbiome differences between dingoes** 163 **and GSDs**

164 Prior to the dietary manipulation study, we minimised variation in the gut flora by treating  
165 canids with a broad-spectrum antibiotic and then supplementing their diets with a probiotic.  
166 In parallel, 17 dingoes and 15 GSDs were fed a constant diet for 10d and then the proportion  
167 of rice was increased to 75% over the next 4d (Supplementary data 2.2). As expected, ddPCR  
168 analysis showed *AMY2B* copy number and serum amylase levels were lower in dingoes than  
169 GSDs (Fig 2a, b). Unexpectedly, total cholesterol was significantly higher in the dingoes as  
170 compared to GSDs (Fig 2c). Low-density lipoprotein (LDL) cholesterol was elevated in  
171 dingoes (Fig 2d), but there were no obvious differences in high-density lipoprotein  
172 cholesterol levels or in lipase or triglycerides (Extended Data Fig. 6). Elevated cholesterol  
173 and LDL levels are protective against infection<sup>22</sup>, suggesting dingoes have an elevated  
174 immune response in comparison to GSDs<sup>23</sup>.

175

176 A significant difference in cholesterol levels leads to the prediction that bile acid  
177 levels would differ between canids as primary bile acids are synthesized from cholesterol<sup>24</sup>.  
178 We observed no significant difference in the concentration of primary bile acids, however,  
179 levels of the secondary bile acids ursodeoxycholic acid (UDCA) and lithocholic acid (LCA)  
180 were higher in GSDs (Fig 2e; Supplementary Table 2.2). High levels of UDCA and LCA are  
181 involved in immune suppression<sup>25</sup>. They also influence the gut microbial community<sup>26</sup>, and  
182 may lead to diseases of the gastrointestinal system<sup>24</sup>.

183

184 Amylase, cholesterol, and bile acid levels can shape the gut microbiome so we  
185 investigated scat microbial communities<sup>26,27</sup>. There was a trend for reduced diversity and  
186 richness in the scat microbial community of dingoes on day one of the dietary study

187 (Extended Data Fig. 7a). On day 14, dingoes had markedly reduced microbial richness and  
188 diversity (Fig. 2f), with a distinct microbial community structure and composition (Extended  
189 Data Fig. 7b). Aligning with our previous observations (Fig. 2c), microbial communities in  
190 dingoes show higher metabolic potential for cholesterol and protein metabolism and lower  
191 metabolic potential for bile secretion (Extended Data Fig. 7c).

192

193 Analysis of the microbiome composition showed that one microbial phylum, 17  
194 families, and 51 genera differed between the canids (Supplementary Table 2.3, 2.4). In  
195 dingoes, the family *Clostridiaceae* and the genus *Clostridium sensu stricto 1* were enriched  
196 (Fig. 2g). *Clostridium sensu stricto 1* can utilize complex resistant starch<sup>28</sup> that will not have  
197 been broken down by the dingoes due to low amylase activity. In contrast, bacteria of the  
198 families *Lactobacillaceae*, *Ruminococcaceae*, and *Prevotellaceae* were depleted in dingoes  
199 (Extended Data Fig. 7d, 7e), although two dingoes from Pure Dingo from had high numbers  
200 of the latter Family suggesting environmental differences may also be important. These three  
201 families are involved in the fermentation and degradation of starch products<sup>29-31</sup>. Linking  
202 with our observation that dingoes have high cholesterol (Fig. 2c) the genera *Lactobacillus*  
203 and *Eubacterium* were low in dingoes. Specific strains of these taxa have a demonstrated  
204 capacity to reduce cholesterol levels<sup>26,32-34</sup>.

205

206 We hypothesised that the dingo genome and microbiome will influence scat  
207 metabolites and the composition of chemicals involved in territory marking. We found three  
208 chemical differences between the two groups. Phenylethyl alcohol (PE) is elevated in  
209 dingoes, while ethanone, 1-phenyl quinoline (also known as acetophenone), and 2-methyl  
210 (QM) levels are lower (Fig 2h, Supplementary Table 2.5). PE is known to have antibacterial  
211 activity, inhibiting the growth of Gram negative bacteria<sup>35</sup> and elevating levels of

212 *Clostridiaceae*<sup>36</sup>. PE levels are negatively correlated with *Lactobacillaceae*<sup>36</sup>. Acetophenone  
213 and 2-methyl have a distinct odour and have previously been shown important chemicals for  
214 scent marking in canids<sup>37-39</sup>. Experimental studies are required to test whether the well-  
215 established dingo scent-marking behaviour is related to the balance of these three  
216 compounds.

217

218

**Fig. 2: Biochemical and physiological differences between dingoes and German Shepherd Dogs (GSD).**

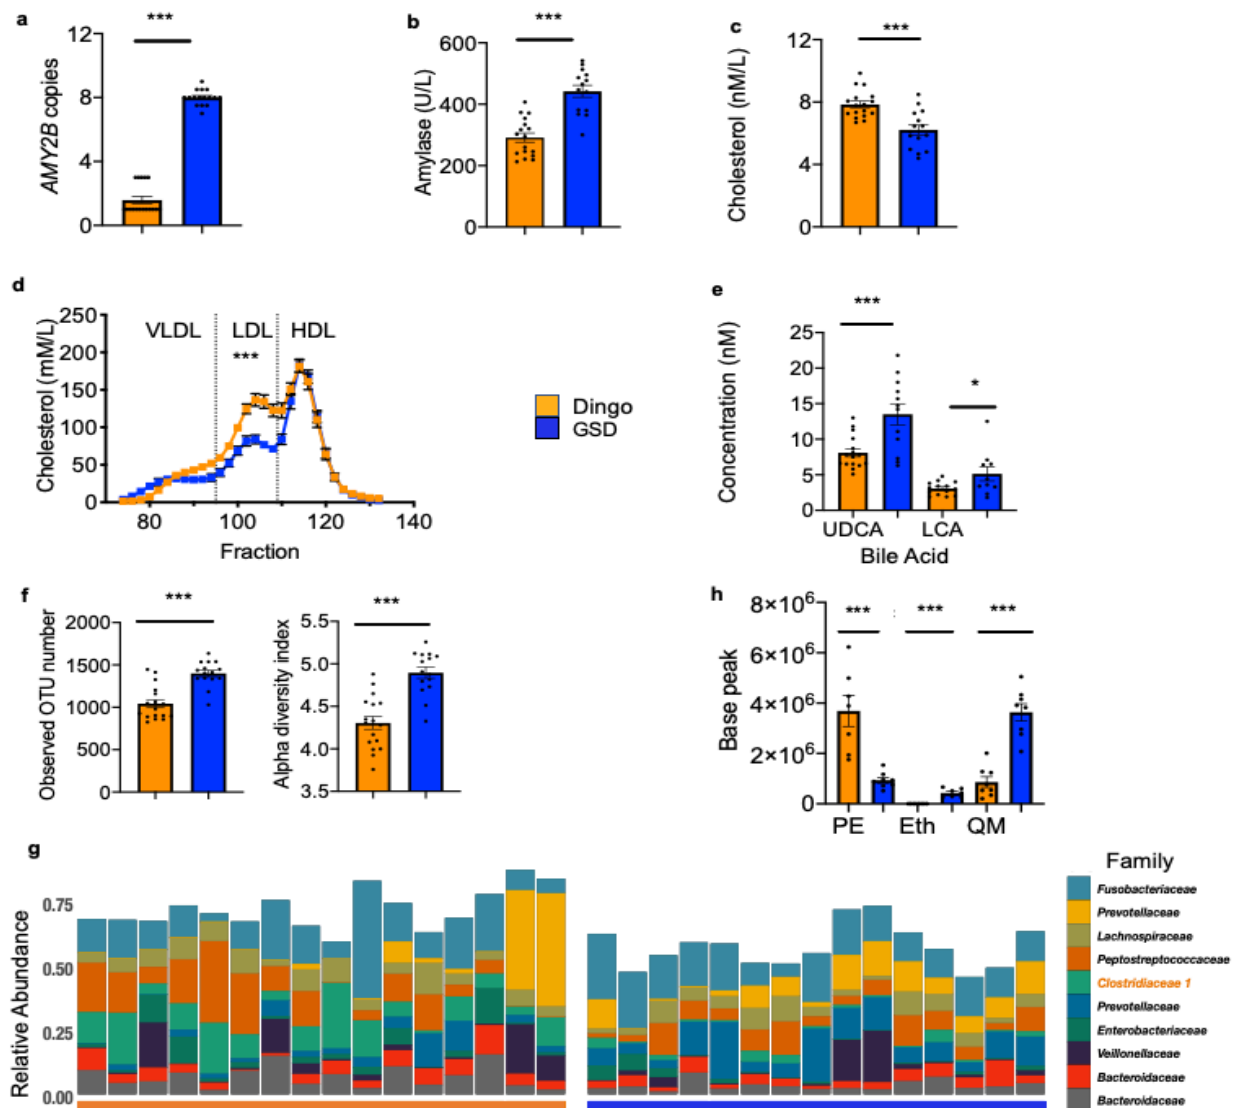

**a**, Amylase. *AMY2B* copy number is lower in dingoes than GSDs ( $t_{31} = 24.42$ ,  $P < 0.0001$ ) with fewer copies in dingoes (mean =  $1.58 \pm 0.22$ ) than GSDs (mean =  $8 \pm 0.12$ ; dingo  $n = 17$ , GSD  $n = 16$ ). **b**, Serum amylase levels are lower in the dingo compared to the GSD ( $t_{29} = 6.25$ ,  $P < 0.0001$ ; dingo  $n = 17$ , GSD  $n = 14$ ). **c**, Total cholesterol is significantly higher in the dingoes as compared to GSDs ( $t_{30} = 4.36$ ,  $P = 0.0001$ ; dingo  $n = 17$ , GSD  $n = 15$ ). **d**, LDL-C is elevated 2.2-fold in dingoes ( $t_{10} = 4.64$ ,  $P < 0.001$ ; dingo  $n = 6$ , GSD  $n = 6$ ) but no obvious difference in HDL-C levels. Individual points are within symbol size. **e**, Two secondary bile acids Ursodeoxycholic acid (UDCA) ( $t_{26} = 3.732$ ,  $P < 0.001$ ; dingo  $n = 16$ , GSD  $n = 12$ ), and Lithocholic acid (LCA) ( $t_{22} = 2.314$ ,  $P = 0.030$ ; dingo  $n = 14$ , GSD  $n = 10$ ) are significantly lower in dingoes. **f**, Microbial diversity: LHS Microbial richness (Wilcoxon Rank Sum test  $P_{\text{adj}} = 0.00003$ ; dingo  $n = 17$ , GSD  $n = 15$ ). RHS. Shannon's diversity in the dingo and GSD (Wilcoxon Rank Sum test  $P_{\text{adj}} = 0.00001$ ; dingo  $n = 17$ , GSD  $n = 15$ ). **g**, Relative abundance of the top 10 most abundant zOTUs at completion of the diet study on the y-axis for the dingoes ( $n = 16$ ) and GSDs ( $n = 15$ ) along the x-axis. *Clostridiaceae 1* is highlighted in the legend as it is elevated in dingoes. **h**, Metabolite differences between dingo and GSD in the scat; PE = Phenylethyl alcohol ( $t_{13} = 4.68$ ,  $P = 0.0004$ ; dingo  $n = 7$ , GSD  $n = 8$ ), Eth = Ethanone, 1-phenyl ( $t_{13} = 7.26$ ,  $P < 0.0001$ ; dingo  $n = 7$ , GSD  $n = 8$ ), and QM = Quinoline, 2-methyl ( $t_{14} = 6.88$ ,  $P < 0.0001$ ; dingo  $n = 8$ , GSD  $n = 8$ ). Mean SE is shown on the plot. \* shows  $P < 0.05$ , \*\*  $P < 0.01$ , \*\*\*  $P < 0.01$ .

## 220 **Discussion**

221 Dingoes are a part of the fabric of Australian culture, touching both indigenous groups and  
222 more recent immigrants<sup>40</sup>. They are considered a “*lightning-rod*” of the land as it generates  
223 polarised opinions from Aboriginal people, tourism operators, pastoralists, ecologists,  
224 conservationists, and evolutionary biologists<sup>4</sup>. Our comprehensive study underpins the  
225 dingoes genomic and ecological distinction from breed dogs by integrating genomic,  
226 metabolome, and microbiome analyses. Our genome assembly has high contiguity with few  
227 gaps compared to other canine long-read sequencing assemblies (Supplementary Table 1.1).  
228 We found unique inversions on Chromosome 16 in the dingo indicating differential  
229 evolutionary signatures. Epigenetics analysis indicated seven genes are differentially  
230 methylated in the dingo compared to the domestic GSD. Our organismal studies provide  
231 insights into the distinct physiology of dingoes as compared to domestic dogs and suggest  
232 they have a heightened immune response and a microbial community that, at least partially,  
233 compensates for their reduced *AMY2B* copy number.

234         The importance of dingoes in Australia can be illustrated by comparisons from either  
235 side of the Dingo Fence: the world’s largest chain link fence that is designed to keep dingoes  
236 out of prime livestock farming country in South-East Australia. Inside the fence, kangaroo  
237 populations have skyrocketed, while populations outside the fence are smaller but stable.  
238 Excessive kangaroo numbers can overgraze the landscape, compete with livestock and  
239 damage vegetation. Further studies of scat metabolites linked to territory marking may prove  
240 part of a broad solution to chemically subdivide the landscape and reduce conflict between  
241 native animals and commercial farming.

242

243

## 244 **Methods**

245 Full details of methods can be found in the Supplementary information.

246

### 247 **Genome assembly, annotation, and comparative analyses**

248 The genome was assembled using Pacific Bioscience (PacBio) Single Molecule Real-Time

249 (SMRT) sequencing, Oxford Nanopore (ONT) PromethION sequencing, 10X Genomics

250 Chromium genome sequencing and Hi-C scaffolding (Fig. 1b). Contigs were assembled using

251 SMRT and ONT sequencing<sup>41</sup> and then polished<sup>42</sup> to minimise error propagation

252 (Supplementary Information 1). To increase the contiguity of the assembly we used the

253 SMRT and ONT reads to fill gaps, which was then followed by a final round of polishing

254 including aligning the 10X Chromium reads to the assembly and Pilon polishing. The

255 resulting chromosome-length genome assembly has been deposited to NCBI

256 (GCA\_003254725.2). In addition to the nuclear genome, the mitochondrial genome has been

257 submitted (ID 2385777) and will be linked with the bioproject and biosample.

258

259 The CanLup\_DDS (Desert Dingo Sandy) and CanFam\_GSD assemblies were aligned

260 to CanFam3.1 using MUMmer4<sup>43</sup> (v4.0.0 beta 2) to assess the overall alignment of the two

261 assemblies. The genome was annotated using the homology-based gene prediction program

262 GeMoMa (GeMoMa, RRID:SCR 017646) v1.6.2beta<sup>16</sup> and 9 reference organisms<sup>13</sup>.

263

264 Small-scale variation was detected in both the dingo assembly and CanFam\_GSD

265 relative to CanFam v3.1 using pairwise MUMmer4<sup>43</sup> (v4.0.0 beta 2) alignment databases

266 (Supplementary Information 1). To identify large structural differences in the dingo genome,

267 structural variants from both Oxford Nanopore and PacBio sequence data were called relative

268 to CanFam 3.1 and CanFam\_GSD.

269

270 Genetic differentiation between the dingo and the domestic dog breeds was detected  
271 using pairwise  $F_{st}$  on published dingo, GSD, and Boxer genomes (Supplementary  
272 Information 1). The short reads were aligned against the dingo de novo reference using the  
273 PALEOMIX pipeline<sup>44</sup>.  $F_{st}$  between each pair of populations: dingo-GSD, dingo-boxer, and  
274 GSD-boxer was computed using vcftools v0.1.16.

275

276 We profiled DNA methylation of the dingo and GSD genomes using MethylC-seq<sup>45</sup>  
277 and identified CpG-rich unmethylated regions (UMRs) overlapping transcription start sites  
278 (TSS) in both genomes (Supplementary Information 1). To compare the DNA methylation  
279 status of gene promoters between dingo and GSD, we lifted over dingo UMRs to the GSD  
280 genome and GSD UMRs to the dingo genome and calculated corresponding DNA  
281 methylation. To validate the difference in expression in *GAL3ST1* and *MAB21L1* we  
282 performed quantitative reverse transcription PCR RT-qPCR on six dingoes and six GSDs.

283

284 Biochemical, physiological, and microbiome differences between dingoes and  
285 GSDs

286 Before carrying out experiments, diets of the animals were standardised (Supplementary  
287 Information 2). Amylase DNA copy number variation was determined using droplet digital  
288 PCR (ddPCR) on QX100 ddPCR system (Bio-rad). Amylase, cholesterol, triglycerides,  
289 and lipase and were assayed using the Thermo Scientific Konelab Prime 30i at the Veterinary  
290 Pathology Diagnostic Services Laboratory (VPDS). Free bile acids in the plasma were  
291 quantified using liquid chromatography-tandem mass spectrometry (LCMS/MS) assay.

292

293 Simultaneously with the biochemical studies, we sampled scat from the same dingoes  
294 and GSD's on day 1 and 14. DNA was extracted from thawed stool samples (0.3g) using the



295 Qiagen Powersoil kit (cat# 1288-100; Hilden, Germany) according to the manufacturer's  
296 instruction. Library preparation and pair end sequencing was performed (2x300 cycles) on  
297 the Illumina MiSeq platform. 16S rRNA gene sequence data were quality filtered and  
298 processed for taxonomic assignment and functional predictions (Supplementary Table 2.3)  
299

300 We examined scat volatile organic compounds (VOC's) differences using solid-phase  
301 microextraction (SPME) gas chromatography-mass spectrometry (GC-MS) (Supplementary  
302 Table 2.5).

303

### 304 **Data availability**

305 The complete assembled genome is available at NCBI (ASM325472v2; GenBank assembly  
306 accession No. GCA\_003254725.2).

307

### 308 **References**

- 309 1 Ritchie, E. G. *et al.* Ecosystem restoration with teeth: what role for predators? *Trends*  
310 *Ecol Evol* **27**, 265-271 (2012)
- 311 2 Savolainen, P., Leitner, T., Wilton, A. N., Matisoo-Smith, E. & Lundeberg, J. A  
312 detailed picture of the origin of the Australian dingo, obtained from the study of  
313 mitochondrial DNA. *Proceedings of the National Academy of Sciences* **101**, 12387-  
314 12390 (2004)
- 315 3 Balme, J., O'Connor, S. & Fallon, S. New dates on dingo bones from Madura Cave  
316 provide oldest firm evidence for arrival of the species in Australia. *Scientific reports*  
317 **8**, 1-6 (2018)
- 318 4 Ballard, J. W. O. & Wilson, L. A. B. The Australian dingo: untamed or feral? *Front*  
319 *Zool* **16**, 2 (2019)
- 320 5 Corbett, L. *The dingo in Australia and Asia*. (J.B. Books Australia, 2001)
- 321 6 Zhang, S. J. *et al.* Genomic regions under selection in the feralization of the dingoes.  
322 *Nature Communications* **11** (2020)
- 323 7 Freedman, A. H. *et al.* Genome sequencing highlights the dynamic early history of  
324 dogs. *PLoS Genet* **10**, e1004016 (2014)
- 325 8 vonHoldt, B. M. *et al.* Genome-wide SNP and haplotype analyses reveal a rich history  
326 underlying dog domestication. *Nature* **464**, 898-902 (2010)
- 327 9 Wang, G.-D. *et al.* Out of southern East Asia: the natural history of domestic dogs  
328 across the world. *Cell research* **26**, 21-33 (2016)
- 329 10 Arendt, M., Cairns, K. M., Ballard, J. W. O., Savolainen, P. & Axelsson, E. Diet  
330 adaptation in dog reflects spread of prehistoric agriculture. *Heredity* **117**, 301-306  
331 (2016)

- 332 11 Axelsson, E. *et al.* The genomic signature of dog domestication reveals adaptation to  
333 a starch-rich diet. *Nature* **495**, 360-364 (2013)
- 334 12 Lindblad-Toh, K. *et al.* Genome sequence, comparative analysis and haplotype  
335 structure of the domestic dog. *Nature* **438**, 803-819 (2005)
- 336 13 Field, M. A. *et al.* Canfam\_GSD: *De novo* chromosome-length genome assembly of  
337 the German Shepherd Dog (*Canis lupus familiaris*) using a combination of long reads,  
338 optical mapping and Hi-C. *GiGaScience* **9**, g1aa027 (2020)
- 339 14 Parker, H. G. *et al.* Genomic Analyses Reveal the Influence of Geographic Origin,  
340 Migration, and Hybridization on Modern Dog Breed Development. *Cell Rep* **19**, 697-  
341 708 (2017)
- 342 15 Field, M. A., Cho, V., Andrews, T. D. & Goodnow, C. C. Reliably Detecting  
343 Clinically Important Variants Requires Both Combined Variant Calls and Optimized  
344 Filtering Strategies. *PLoS One* **10**, e0143199 (2015)
- 345 16 Keilwagen, J., Hartung, F. & Grau, J. GeMoMa: Homology-Based Gene Prediction  
346 Utilizing Intron Position Conservation and RNA-seq Data. *Methods Mol Biol* **1962**,  
347 161-177 (2019)
- 348 17 Ollivier, M. *et al.* Amy2B copy number variation reveals starch diet adaptations in  
349 ancient European dogs. *R Soc Open Sci* **3**, 160449 (2016)
- 350 18 Pendleton, A. L. *et al.* Comparison of village dog and wolf genomes highlights the  
351 role of the neural crest in dog domestication. *BMC Biol* **16**, 64 (2018)
- 352 19 Edwards, R. J. *et al.* Chromosome-length genome assembly and structural variations  
353 of the primal Basenji dog (*Canis lupus familiaris*) genome. *bioRxiv* (2020).
- 354 20 Seko, A., Hara-Kuge, S. & Yamashita, K. Molecular cloning and characterization of a  
355 novel human galactose 3-O-sulfotransferase that transfers sulfate to Gal $\beta$ 1 $\rightarrow$   
356 3GalNAc residue in O-glycans. *Journal of Biological Chemistry* **276**, 25697-25704  
357 (2001)
- 358 21 Sonu Yadav, R. P., Robert A. Zammit, J. William O. Ballard. Metabolomics shows  
359 the Australian dingo has a unique plasma profile. *bioRxiv* (2020)
- 360 22 Ravnskov, U. High cholesterol may protect against infections and atherosclerosis.  
361 *QJM* **96**, 927-934 (2003)
- 362 23 Poledne, R. & Zicha, J. Human genome evolution and development of cardiovascular  
363 risk factors through natural selection. *Physiol Res* **67**, 155-163 (2018)
- 364 24 Ridlon, J. M., Harris, S. C., Bhowmik, S., Kang, D.-J. & Hylemon, P. B.  
365 Consequences of bile salt biotransformations by intestinal bacteria. *Gut microbes* **7**,  
366 22-39 (2016)
- 367 25 Yoshikawa, M. *et al.* Immunomodulatory effects of ursodeoxycholic acid on immune  
368 responses. *Hepatology* **16**, 358-364 (1992)
- 369 26 Molinero, N., Ruiz, L., Sánchez, B., Margolles, A. & Delgado, S. Intestinal Bacteria  
370 interplay with bile and cholesterol metabolism: implications on host physiology.  
371 *Frontiers in physiology* **10**, 185 (2019)
- 372 27 Poole, A. C. *et al.* Human Salivary Amylase Gene Copy Number Impacts Oral and  
373 Gut Microbiomes. *Cell Host Microbe* **25**, 553-+ (2019)
- 374 28 Purwani, E. Y., Purwadaria, T. & Suhartono, M. T. Fermentation RS3 derived from  
375 sago and rice starch with *Clostridium butyricum* BCC B2571 or *Eubacterium rectale*  
376 DSM 17629. *Anaerobe* **18**, 55-61 (2012)
- 377 29 Agaliya, P. J. & Jeevaratnam, K. Molecular characterization of lactobacilli isolated  
378 from fermented idli batter. *Brazilian Journal of Microbiology* **44**, 1199-1206 (2013)
- 379 30 Bai, Y. *et al.* Lactobacillus reuteri Strains Convert Starch and Maltodextrins into  
380 Homoexopolysaccharides Using an Extracellular and Cell-Associated 4,6- $\alpha$ -

- 381 Glucanotransferase. *Journal of Agricultural and Food Chemistry* **64**, 2941-2952  
382 (2016)
- 383 31 Herrmann, E. *et al.* Determination of resistant starch assimilating bacteria in fecal  
384 samples of mice by in vitro RNA-based stable isotope probing. *Frontiers in*  
385 *microbiology* **8**, 1331 (2017)
- 386 32 Fuentes, M. C., Lajo, T., Carrión, J. M. & Cuñé, J. Cholesterol-lowering efficacy of  
387 *Lactobacillus plantarum* CECT 7527, 7528 and 7529 in hypercholesterolaemic adults.  
388 *British Journal of Nutrition* **109**, 1866-1872 (2013)
- 389 33 Tomaro-Duchesneau, C. *et al.* Cholesterol assimilation by *Lactobacillus* probiotic  
390 bacteria: an in vitro investigation. *BioMed research international* **2014** (2014)
- 391 34 Choi, E. A. & Chang, H. C. Cholesterol-lowering effects of a putative probiotic strain  
392 *Lactobacillus plantarum* EM isolated from kimchi. *LWT - Food Science and*  
393 *Technology* **62**, 210-217 (2015)
- 394 35 Lilley, B. D. & Brewer, J. H. The selective antibacterial action of phenylethyl alcohol.  
395 *Journal of the American Pharmaceutical Association* **42**, 6-8 (1953)
- 396 36 De Angelis, M. *et al.* Effect of whole-grain barley on the human fecal microbiota and  
397 metabolome. *Applied and environmental microbiology* **81**, 7945-7956 (2015)
- 398 37 Martín, J., Barja, I. & López, P. Chemical scent constituents in feces of wild Iberian  
399 wolves (*Canis lupus signatus*). *Biochemical Systematics and Ecology* **38**, 1096-1102  
400 (2010)
- 401 38 Apps, P., Mmualefe, L. & McNutt, J. W. Identification of volatiles from the  
402 secretions and excretions of African wild dogs (*Lycaon pictus*). *Journal of Chemical*  
403 *Ecology* **38**, 1450-1461 (2012)
- 404 39 Jorgenson, J. *et al.* Chemical scent constituents in the urine of the red fox (*Vulpes*  
405 *vulpes L.*) during the winter season. *Science* **199**, 796-798 (1978)
- 406 40 Smith, B. P. & Litchfield, C. A. A review of the relationship between Indigenous  
407 Australians, dingoes (*Canis dingo*) and domestic dogs (*Canis familiaris*). *Anthrozoös*  
408 **22**, 111-128 (2009)
- 409 41 Koren, S. *et al.* Canu: scalable and accurate long-read assembly via adaptive k-mer  
410 weighting and repeat separation. *Genome Res* **27**, 722-736 (2017)
- 411 42 Walker, B. J. *et al.* Pilon: an integrated tool for comprehensive microbial variant  
412 detection and genome assembly improvement. *PLoS One* **9**, e112963 (2014)
- 413 43 Marcais, G. *et al.* MUMmer4: A fast and versatile genome alignment system. *PLoS*  
414 *Comput Biol* **14**, e1005944 (2018)
- 415 44 Schubert, M. *et al.* Characterization of ancient and modern genomes by SNP detection  
416 and phylogenomic and metagenomic analysis using PALEOMIX. *Nat Protoc* **9**, 1056-  
417 1082 (2014)
- 418 45 Urich, M. A., Nery, J. R., Lister, R., Schmitz, R. J. & Ecker, J. R. MethylC-seq library  
419 preparation for base-resolution whole-genome bisulfite sequencing. *Nat Protoc* **10**  
420 (2015)
- 421
- 422

## 423 **Acknowledgements**

424

425 Sandy dingo was rescued by Barry and Lyn Eggleton. We wish to thank all those that voted  
426 in the PacBio 2017 World's Most Interesting Genome Competition and to Emily Hatas for  
427 running the show. PacBio sequencing was completed by Dave Kudrna at Arizona Genomics  
428 Institute. v1.0 of the Genome assembled by Christian Dreischer at Computomics. The 10X  
429 and PromethION sequencing was completed at the Garvan Institute, Sydney. Vanessa M.  
430 Hayes at the Garvan Institute funded the BioNano data generation used in the v1 Sandy  
431 genome assembly. The Hi-C sequencing and chromosome-length assembly were performed  
432 by the DNA Zoo Consortium ([www.dnazoo.org](http://www.dnazoo.org)). For the experimental study, dingoes were  
433 made available by Bargo Dingo Sanctuary and Pure Dingo. German Shepherds were kindly  
434 supplied by Kingvale and Allendell Kennels. Sam Towarnicki contributed to the biochemical  
435 assays and Amy Shaw collected scat. William Donald (UNSW) provided chemical standards  
436 for the metabolomics assays. Mass spectrometric results were obtained at the Bioanalytical  
437 Mass Spectrometry Facility within the Mark Wainwright Analytical Centre of the University  
438 of New South Wales. This work was undertaken using infrastructure provided by NSW  
439 Government co-investment in the National Collaborative Research Infrastructure Scheme  
440 (NCRIS) subsidised access to this facility is gratefully acknowledged. The project was  
441 funded by the Australian Research Council Discovery Project DP150102038. M.T.P.G. and  
442 S.G were supported by the ERC (681306 Extinction Genomics) and the Danish National  
443 Research Foundation (DNRF143). E.L.A. was supported by an NSF Physics Frontiers Center  
444 Award (PHY1427654), the Welch Foundation (Q-1866), a USDA Agriculture and Food  
445 Research Initiative Grant (2017-05741), an NIH 4D Nucleome Grant (U01HL130010), and  
446 an NIH Encyclopedia of DNA Elements Mapping Center Award (UM1HG009375).

447

448

449 **Author information**

450

451 **Affiliations**

452

453 **School of Biotechnology and Biomolecular Sciences, UNSW, Sydney, High St,**

454 **Kensington, NSW 2052, Australia**

455 Sonu Yadav, Richard J. Edwards, Ozren Bogdanovic

456

457 **The Center for Genome Architecture, Department of Molecular and Human Genetics,**

458 **Baylor College of Medicine, Houston, TX, USA**

459 Olga Dudchenko, Arina Omer, Zane Colaric, Erez L. Aiden

460

461 **Department of Computer Science, Rice University, Houston, TX, USA**

462 Olga Dudchenko, Erez L. Aiden

463

464 **Center for Theoretical and Biological Physics, Rice University, Houston, TX, USA**

465 Olga Dudchenko, Erez L. Aiden

466

467 **School of Biological, Earth and Environmental Sciences, University of New South**

468 **Wales, Sydney NSW 2052, Australia**

469 Meera Esvaran, Torsten Thomas

470

471 **Animal Genomics and Improvement Laboratory, Agricultural Research Service USDA,**

472 **Beltsville, MD 20705**

473 Benjamin D. Rosen

474

475 **Centre for Tropical Bioinformatics and Molecular Biology, Australian Institute of**

476 **Tropical Health and Medicine, James Cook University, Cairns, QLD 4878, Australia**

477 Matt A. Field

478

479 **John Curtin School of Medical Research, Australian National University, Canberra,**

480 **ACT 2600, Australia**

481 Matt A. Field

482

483 **NSW Health Pathology, Newcastle NSW 2300**

484 Eva K.F. Chan

485

486 **Garvan Institute of Medical Research, Victoria Street, Darlinghurst, NSW**

487 **2010, Australia**

488 Ksenia Skvortsova, Ozren Bogdanovic, Andre E. Minoche

489

490 **St Vincent's Clinical School, Faculty of Medicine, University of New South Wales,**

491 **Sydney, NSW, 2010, Australia**

492 Ksenia Skvortsova

493

494 **Center for Evolutionary Hologenomics, Faculty of Health and Medical Sciences, The**

495 **GLOBE Institute University of Copenhagen, Copenhagen, Denmark**

496 Shyam Gopalakrishnan, M. Jacob Agerbo Rasmussen, M. Thomas P. Gilbert

497

498 **Julius Kühn-Institut, Erwin-Baur-Str. 27 06484 Quedlinburg, Germany**

499 Jens Keilwagen

500

501 **School of Medical Sciences, University of New South Wales, Sydney NSW 2052,**

502 **Australia**

503 Blake J. Cochran, Bikash Manandhar

504

505 **Mark Wainwright Analytical Center, University of New South Wales, Sydney NSW**

506 **2052**

507 Martin Bucknall, Sonia Bustamante

508

509 **Laboratory of Genomics and Molecular Biomedicine, Department of Biology,**

510 **University of Copenhagen, Copenhagen, 2100, Denmark**

511 Jacob Agerbo Rasmussen

512

513 **Department of Biomedical Sciences, 1035 University Drive Duluth, University of**

514 **Minnesota, MN 55812 USA**

515 Richard G. Melvin

516

517 **US Meat Animal Research Center, Agricultural Research Service USDA, Rd 313, Clay**

518 **Center, NE 68933, USA**

519 Timothy P.L. Smith

520

521 **NTNU University Museum, Trondheim, Norway**

522 M. Thomas P. Gilbert

523

524 **Vineyard Veterinary Hospital, 703 Windsor Rd, Vineyard, NSW, 2765**

525 Robert A. Zammit

526

527 **Faculty of Science, UWA School of Agriculture and Environment, University of**

528 **Western Australia, Perth WA.**

529 Erez L. Aiden

530

531 **Shanghai Institute for Advanced Immunochemical Studies, Shanghai Tech University,**

532 **Shanghai, China**

533 Erez L. Aiden

534

535

## 536 **Contributions**

537 J.W.O.B. coordinated, designed and funded the project. S.Y. compiled the data. R.A.Z.

538 provided the samples. B.D.R. performed the ONT sequencing, genome assembly, and

539 polishing. The DNA Zoo initiative including O.D., A.O., and Z.C. performed and funded the

540 Hi-C experiment. O.D. and E.L.A. conducted the Hi-C analyses. K.S. and O.B. funded and

541 conducted the DNA methylation analyses. S.Y. conducted gene expression analysis. R.J.E.

542 performed the final polishing, final assembly cleanup, and KAT analysis. J.K. performed the  
543 genome annotation. R.J.E., E.K.F.C., and B.D.R. performed the *AMY2B* analyses. M.A.F.  
544 performed structural variance analyses. S.G. performed selection analysis. J.W.O.B.  
545 conducted the experimental analyses, M.E., T.T. and J.A.R. performed microbiome analysis.  
546 S.B., B.J. C. and B.M. performed biochemical analysis. M. B. performed metabolite analysis.  
547 S.Y. conducted statistical tests on biochemical and metabolome dataset. R.G.M, A.E.M.,  
548 T.P.L.S. and M.T.P.G. commented on the manuscript. S.Y. and J.W.O.B. wrote the  
549 manuscript. All authors edited and approved the final manuscript.

550

551 **Corresponding author**

552 J. William O. Ballard
